# Supplementary material for: Extracellular vesicles released by non-small cell lung cancer cells drive invasion and permeability in non-tumorigenic lung epithelial cells
Source: PubMed Central journal article supplement (PMC8770483; doi:10.1038/s41598-022-04940-6), 2022-01-19

## Supplemental Information

# Extracellular vesicles released by non-small cell lung cancer cells drive invasion and permeability in non-tumorigenic lung epithelial cells

Humna Hasan<sup>1,†</sup>, Ikjot Singh Sohal<sup>1,2,†</sup>, Zulaida Soto-Vargas<sup>1,†</sup>, Anjali M. Byappanahalli<sup>1</sup>, Sean E. Humphrey<sup>1</sup>, Hana Kubo<sup>1</sup>, Sarunya Kitdumrongthum<sup>3</sup>, Sarah Copeland<sup>1</sup>, Feng Tian<sup>1</sup>, Arthit Chairoungdua<sup>4</sup>, and Andrea L. Kasinski<sup>1,2,\*</sup>

<sup>1</sup>*Department of Biological Sciences, Purdue University, West Lafayette, IN 47907, USA*

<sup>2</sup>*Purdue Center for Cancer Research, Purdue University, West Lafayette, IN 47907, USA*

<sup>3</sup>*Toxicology Graduate Program, Faculty of Science, Mahidol University, Bangkok Thailand*

<sup>4</sup>*Department of Physiology, Faculty of Science, Mahidol University, Bangkok Thailand*

†Equally contributing authors

\*Corresponding author

Andrea L. Kasinski, Ph.D.

akasinski@purdue.edu

Department of Biological Sciences, Purdue University



**Figure S1, related to Figure 2.**

**Induction of invasive phenotype after uptake of NSCLC-derived EVs in human bronchial epithelial cells (HBEC)**

**(A)** Representative histograms of flow cytometry analysis of HBEC cells after treatment with respective Dil-stained EVs for 48 hours (n=1).

**(B)** Representative images of invasive HBEC cells treated with 0.1µg/ml, 0.5µg/ml or 1µg/ml of tumorigenic (A549, Calu6 and H358) and non-tumorigenic (HBEC and BEAS-2B) cell-derived EVs for 24 hours. NSCLC EVs significantly drive invasion in HBECs compared to untreated control. p-values were determined using one-way ANOVA (n=3, \*p<0.05, \*\*p<0.01 and \*\*\*\*p<0.0001). Scale bar, 200 µm.

Figure S2

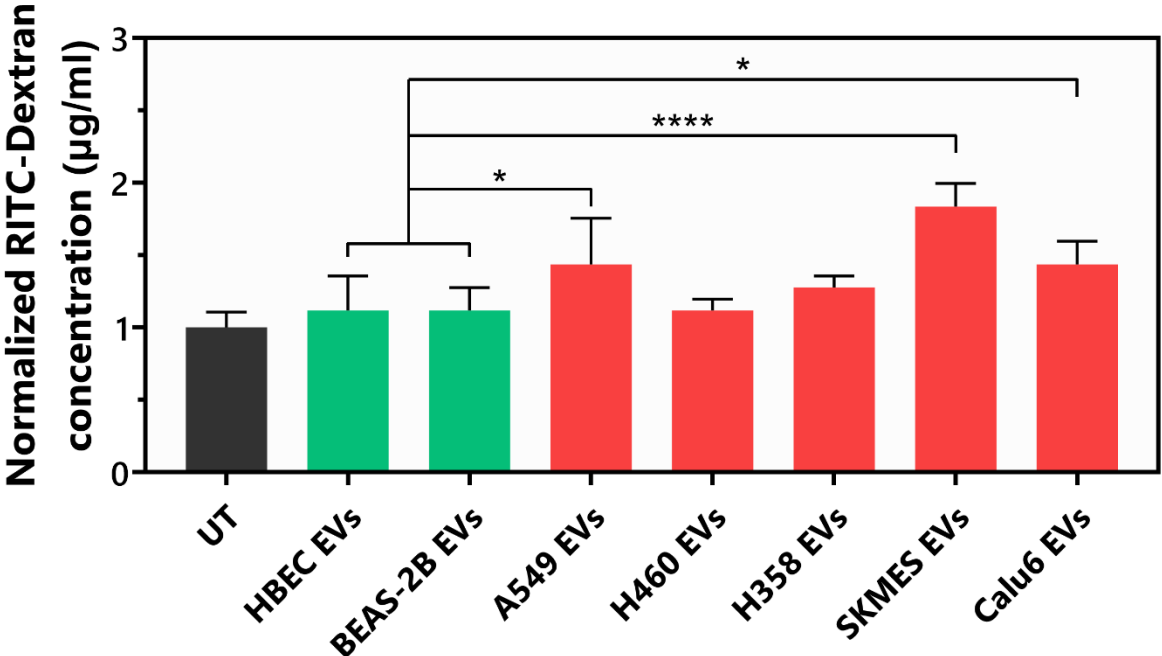

Figure S2, related to Figure 3.

**RITC-Dextran permeability across the BEAS-2B epithelial barrier.**

The bar graph represents the fold-change in the amount of RITC-Dextran in the basal chamber after 1 hr of the 48 hrs EV treatment (n=3). The UT is normalized to 1 µg/mL. \*p<0.05, \*\*p<0.01, \*\*\*p<0.001 and \*\*\*\*p<0.00001

**Figure S3**

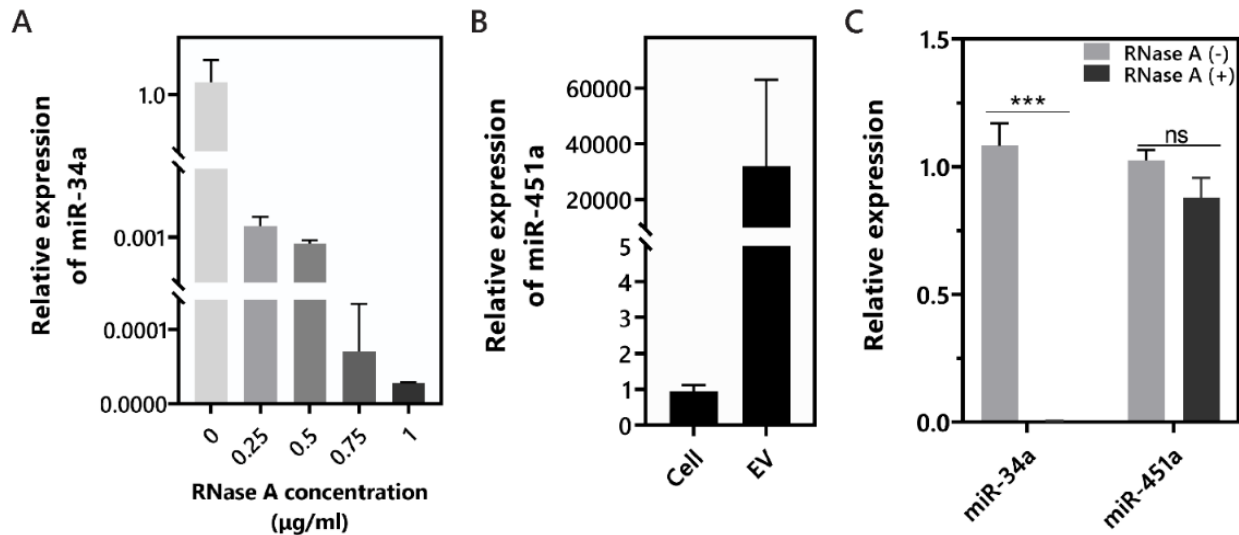

**Figure S3, related to Figure 5.**

**RNase treatments of EVs do not affect EV-RNA and deplete RNA subsets outside EVs**

**(A)** Testing effectiveness of varying concentrations of RNase-A in depleting spiked-in (to represent EV-free RNA) miR-34a (16nM). Relative expression of miR-34a was assessed through qRT-PCR. We chose 0.5  $\mu\text{g/ml}$  concentration of RNase-A for further experiments.

**(B)** qRT-PCR expression analysis reveals abundance of miR-451 in RNA derived from H358 EVs. miR-451a was used in later experiments to represent EV- RNA.

**(C)** Treatment of EVs with RNase-A (0.5  $\mu\text{g/ml}$ ) followed by RNase inhibitor (RI) (7.5U/ml) causes complete depletion of miR-34a (EV-free RNA) while the levels of miR-451a (EV-RNA) remained unaffected.

**Table S1, related to Figure 5D**

**Concentrations of EV-RNA corresponding to 1, 5 and 10  $\mu\text{g/ml}$  of EV-protein for indicated cell lines.** The cells were transfected with a total of 42ng of RNA, therefore, the final RNA concentration for each transfection was supplemented with premiR-NC to keep concentration of RNA consistent in each transfection reaction.

| Cell line | EV Protein ( $\mu\text{g/ml}$ ) | EV-RNA concentration (ng/ml) | premiR-NC (ng/ml) |
|-----------|---------------------------------|------------------------------|-------------------|
| BEAS-2Bs  | 10                              | 22                           | 20                |
| Calu6     | 1                               | 2.5                          | 39.5              |
|           | 5                               | 12.5                         | 29.5              |
|           | 10                              | 25                           | 17                |
| H358      | 1                               | 1.8                          | 40.2              |
|           | 5                               | 9                            | 33                |
|           | 10                              | 18                           | 24                |

**Western blots**

**Figure S4. Biophysical characterization of extracellular vesicles (EVs).**

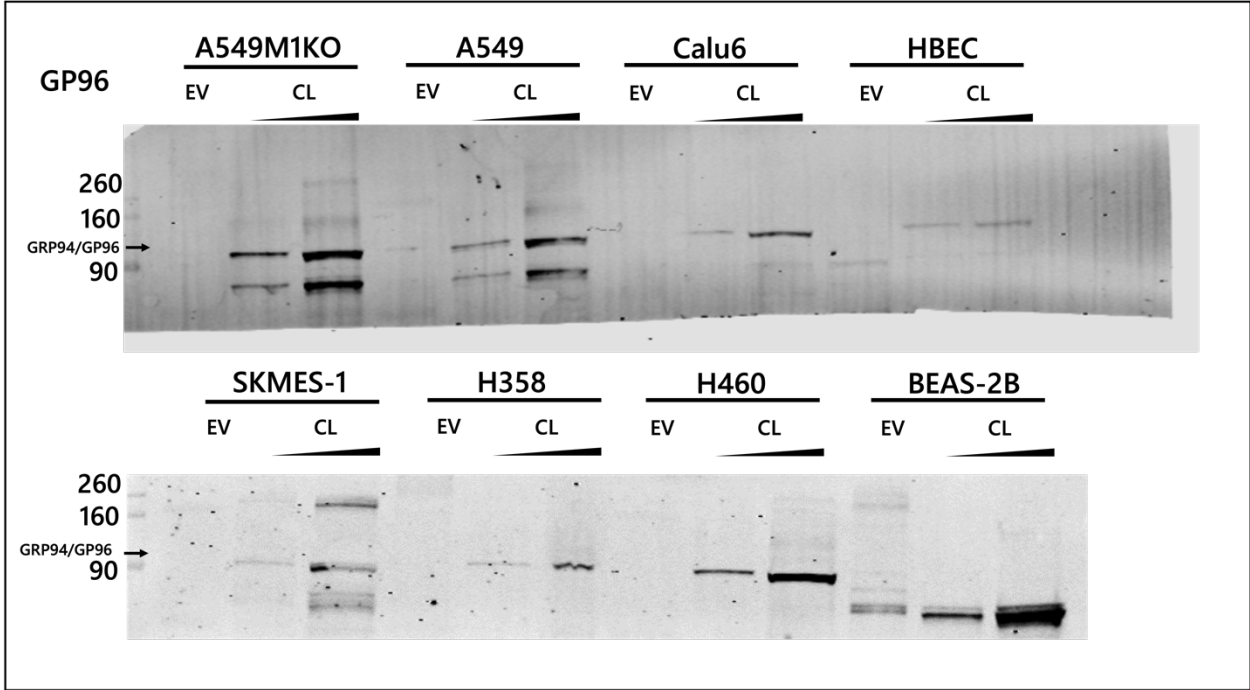

CD9

A549M1KO

A549

Calu6

HBEC

EV

CL

EV

CL

EV

CL

EV

CL

30

CD9 →

15

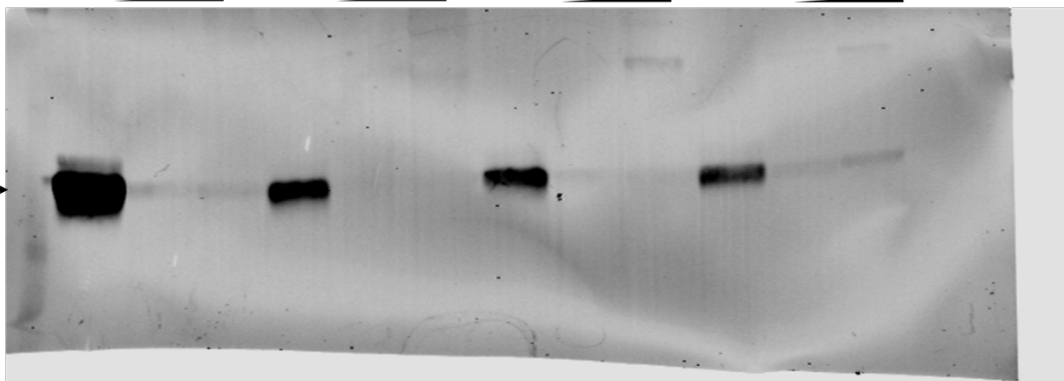

SKMES-1

H358

H460

BEAS-2B

EV

CL

EV

CL

EV

CL

EV

CL

30

CD9 →

15

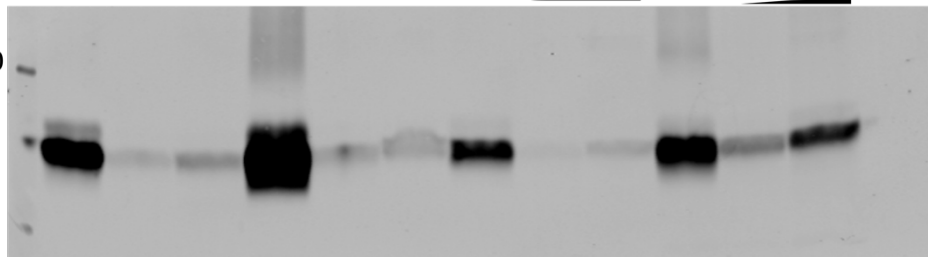



CD81

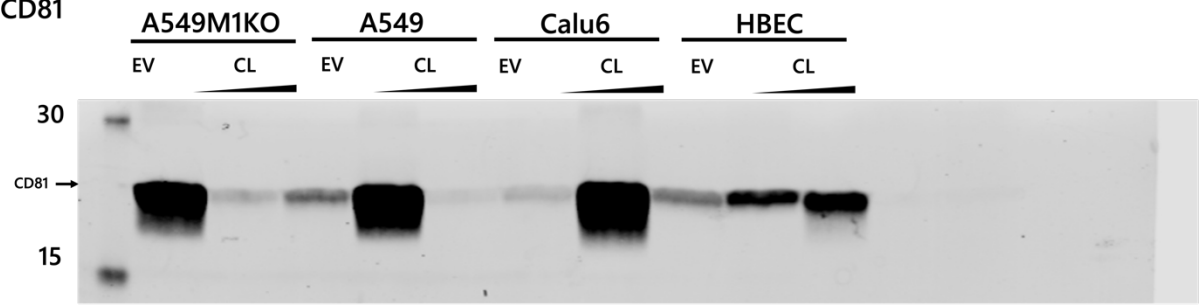

CD81

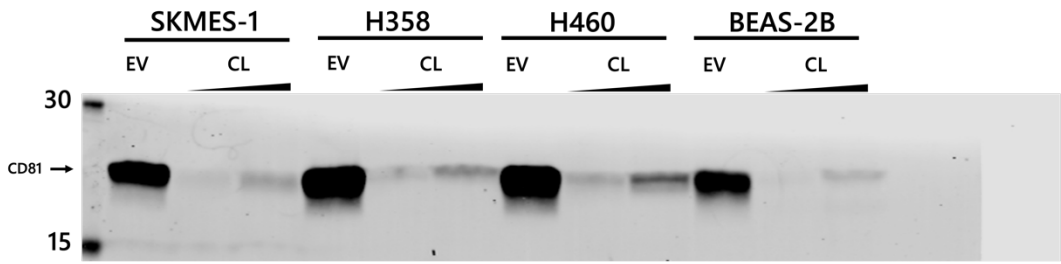

$\beta$ -actin

A549M1KO

A549

Calu6

HBEC

EV

CL

EV

CL

EV

CL

EV

CL

50

$\beta$ -actin  $\rightarrow$

CD81  $\rightarrow$

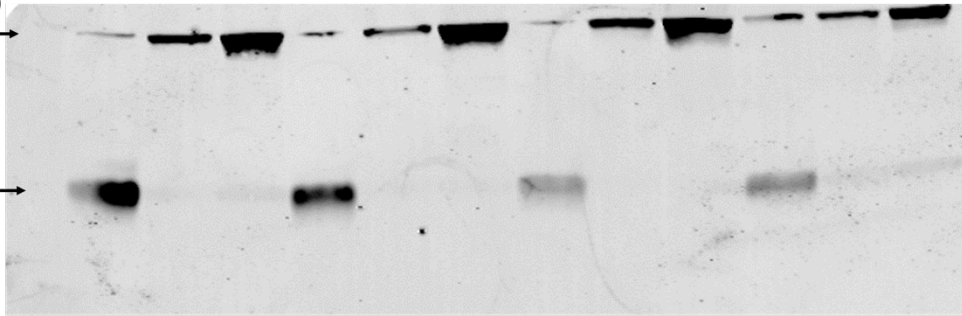

SKMES-1

H358

H460

BEAS-2B

EV

CL

EV

CL

EV

CL

EV

CL

50

$\beta$ -actin  $\rightarrow$

CD81  $\rightarrow$

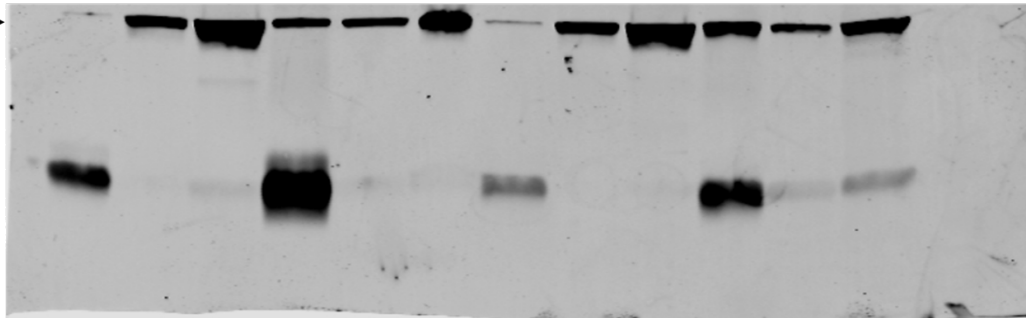

**Figure S5. Varied potential of NSCLC EVs to modulate the expression of junctional complex proteins E-cadherin and ZO-1.**

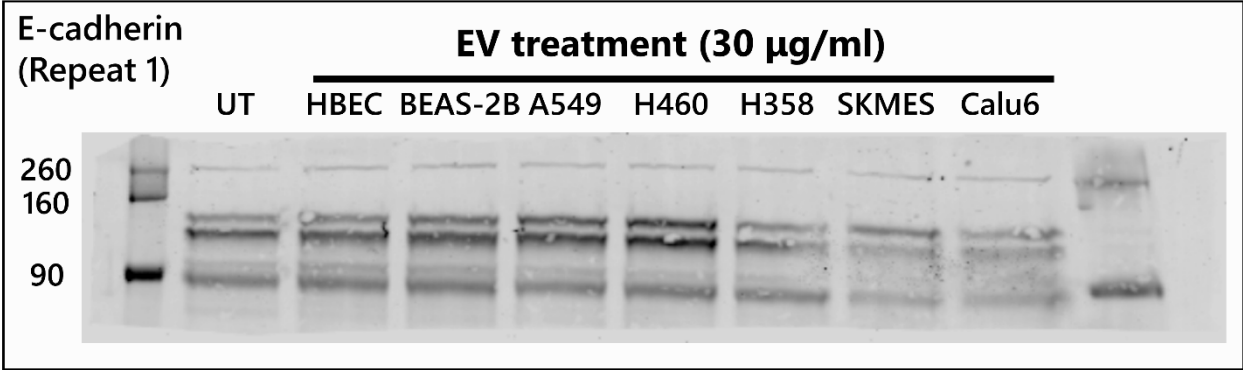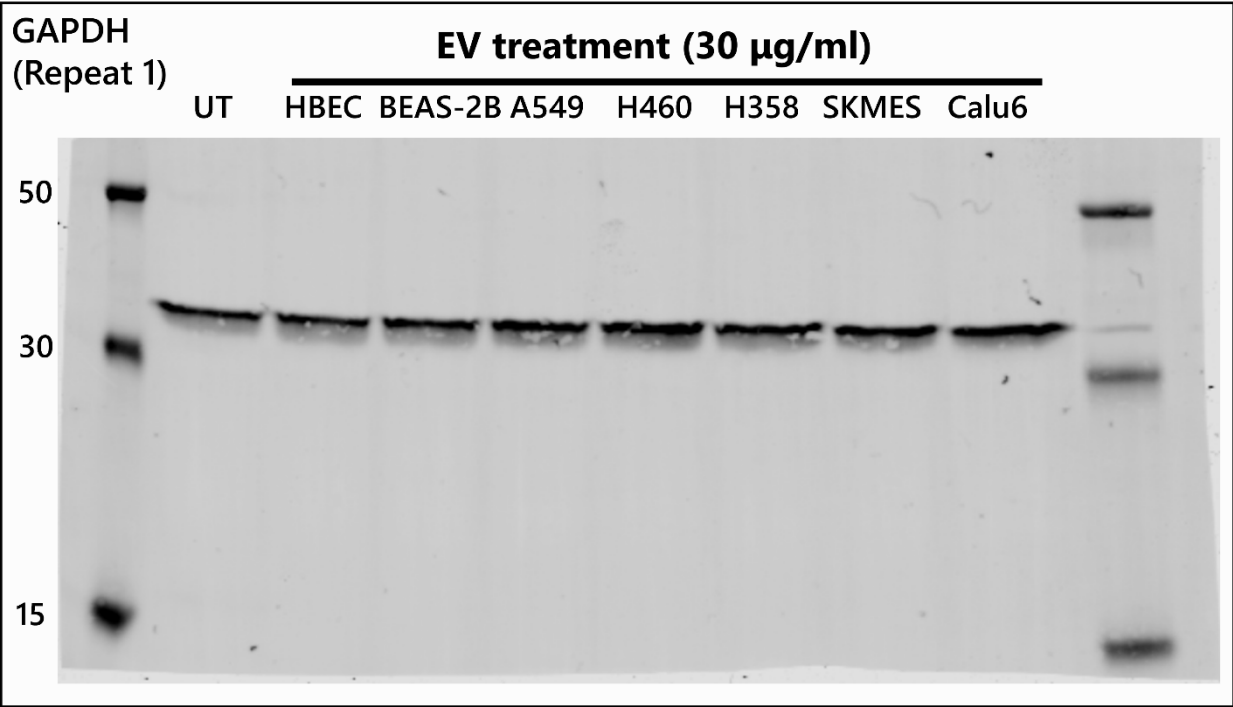

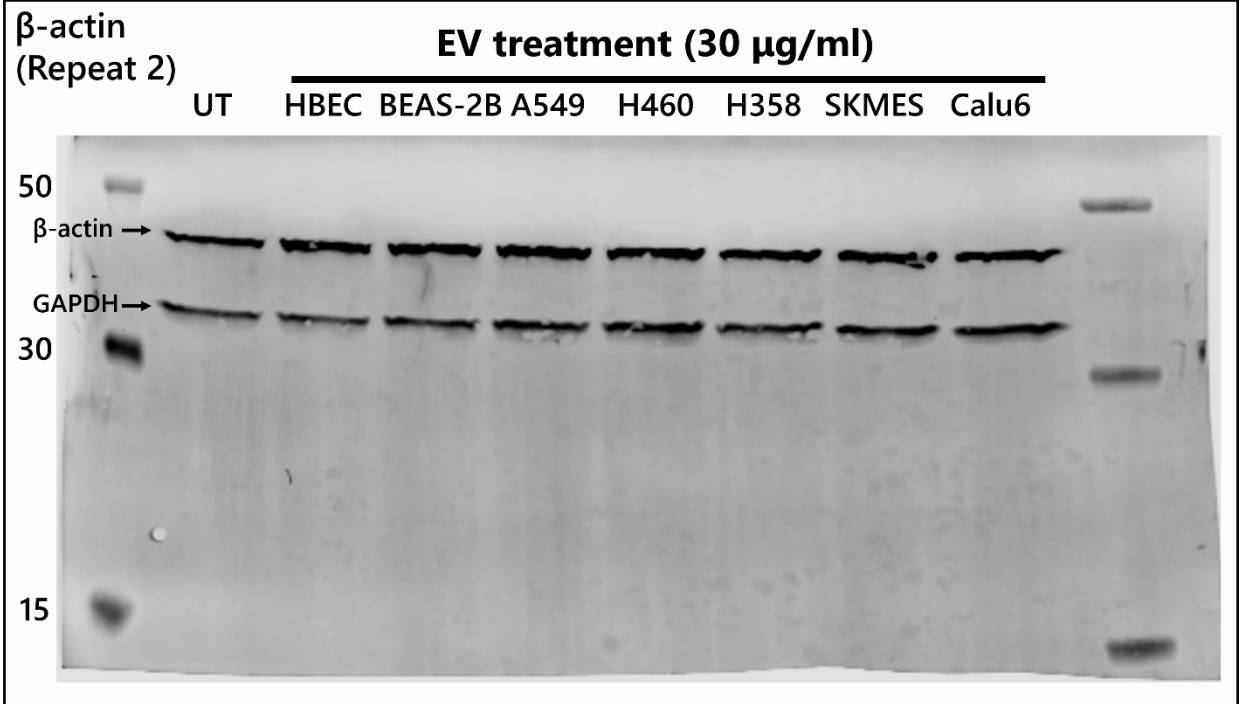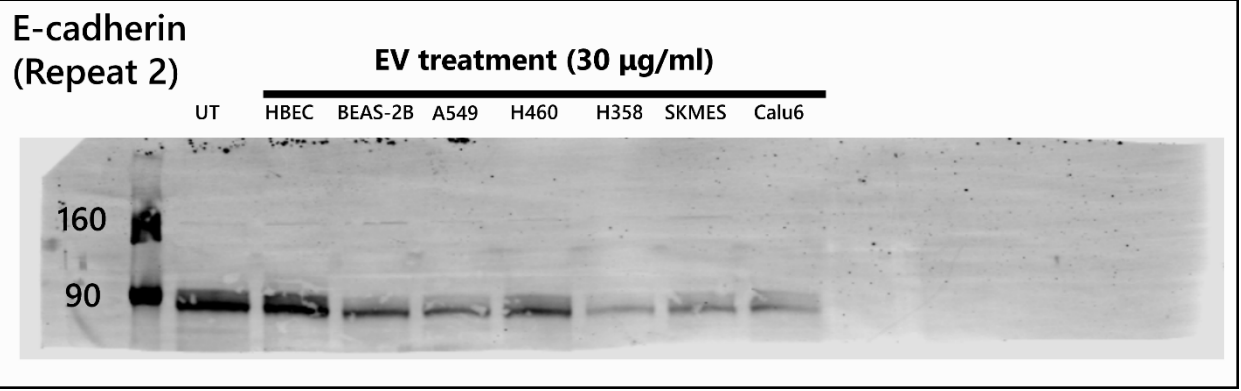

GAPDH  
(Repeat 2)

EV treatment (30  $\mu\text{g/ml}$ )

UT HBEC BEAS-2B A549 H460 H358 SKMES Calu6

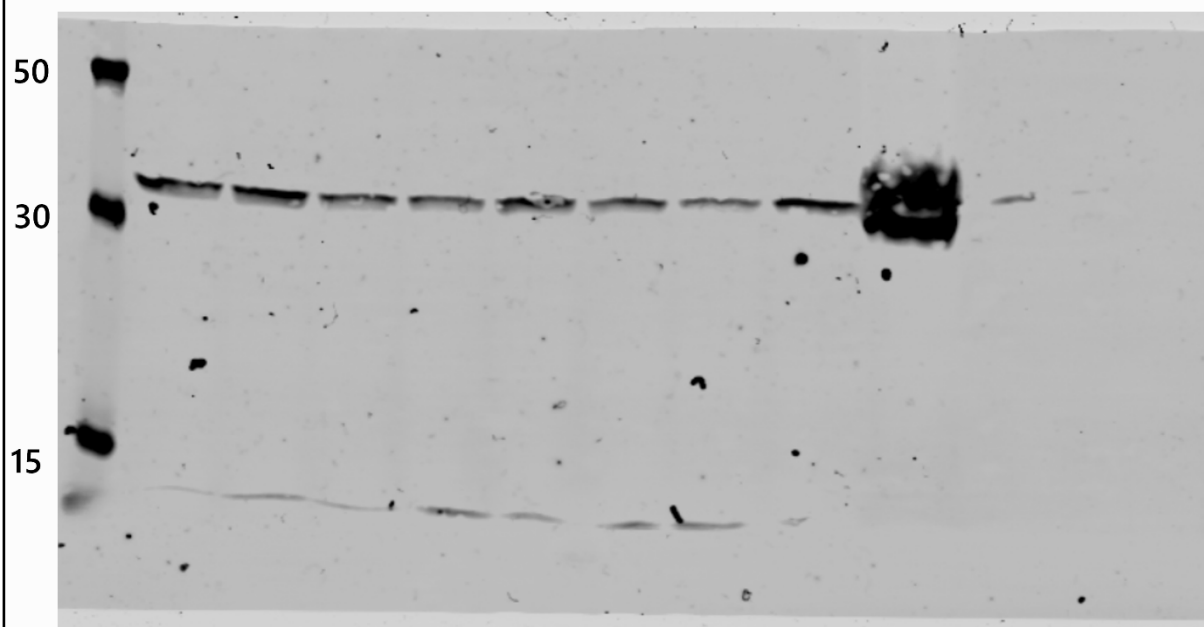

Supplement: 41598_2022_4940_MOESM1_ESM.pdf [file 41598_2022_4940_MOESM1_ESM.pdf]
